# Supplementary figures and images for: Cigarette smoke challenges bone marrow mesenchymal stem cell capacities in guinea pig
Source: Springer Nature journal article supplement (doi:10.1186/s12931-017-0530-0), 2017-03-22

**
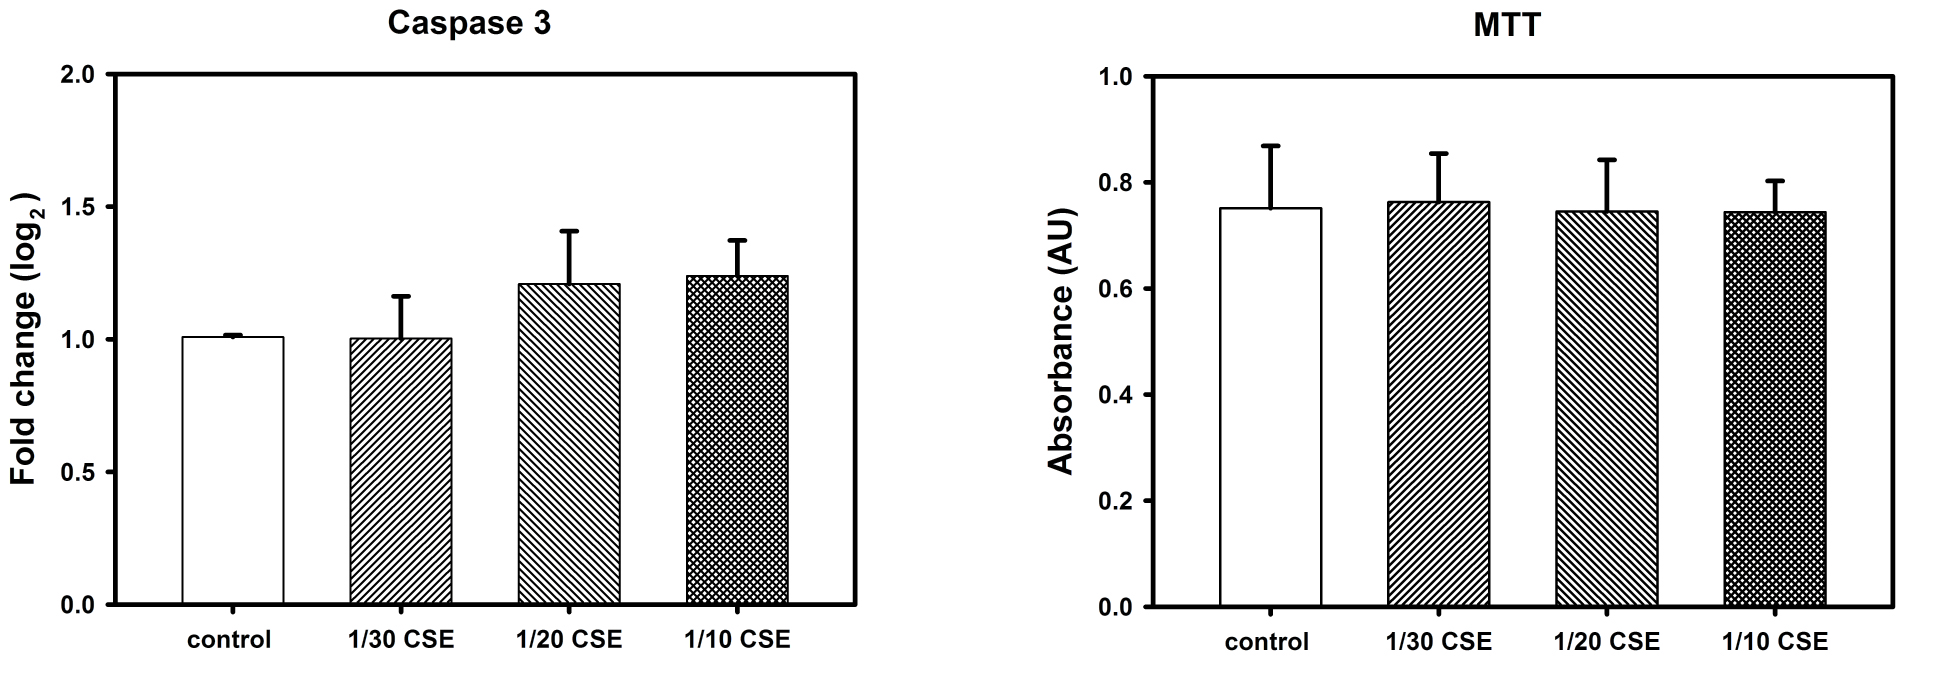
**

Supplement: MOESM1 [file 12169350]
